# Supplementary material
Source: Springer Nature journal article supplement (https://www.springermedizin.de/resource/supplementary/12885_2010_2169_MOESM7_ESM.pdf/9460676)

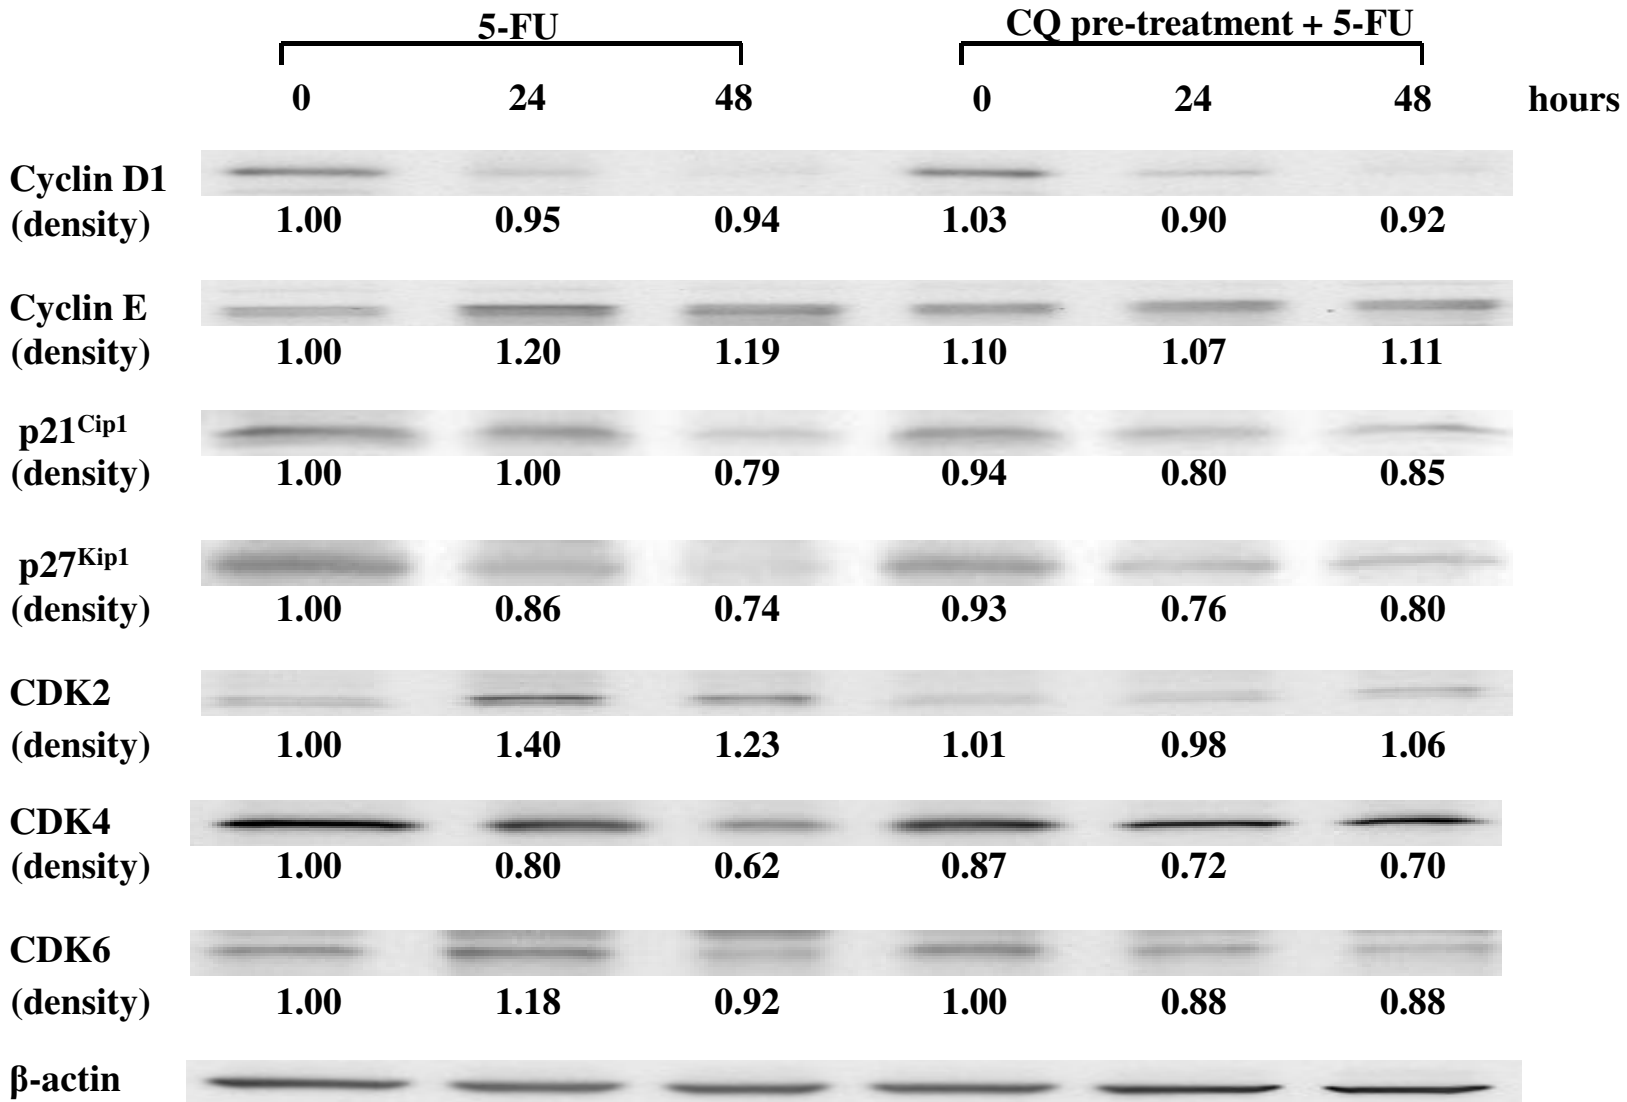

Supplement: MOESM7 [file 9460676]
